# Supplementary material for: Association between Lipid Profiles and the Incidence of Hepatocellular Carcinoma: A Nationwide Population-Based Study
Source: MDPI journal article supplement (doi:10.3390/cancers13071599), 2021-03-30
Supplement: s1 [file s1]

Article

# Association between Lipid Profiles and the Incidence of Hepatocellular Carcinoma: A Nationwide Population-Based Study

Yuri Cho <sup>1,2,†</sup>, Eun Ju Cho <sup>3,†</sup>, Jeong-Ju Yoo <sup>4</sup>, Young Chang <sup>5</sup>, Goh Eun Chung <sup>6</sup>, Su-Min Jeong <sup>7,8</sup>, Sang-Hyun Park <sup>9</sup>, Kyungdo Han <sup>9</sup>, Dong Wook Shin <sup>10,11,\*</sup> and Su Jong Yu <sup>3,\*</sup>

**Citation:** Cho, Y.; Cho, E.J.; Yoo, J.-J.; Chang, Y.; Chung, G.E.; Jeong, S.-M.; Park, S.-H.; Han, K.; Shin, D.W.; Yu, S.J. Association between Lipid Profiles and the Incidence of Hepatocellular Carcinoma: A Nationwide Population-Based Study. *Cancers* **2021**, *13*, 1599. <https://doi.org/10.3390/cancers13071599>

Academic Editor: Masahito Shimizu

Received: 5 February 2021

Accepted: 23 March 2021

Published: 30 March 2021

**Publisher's Note:** MDPI stays neutral with regard to jurisdictional claims in published maps and institutional affiliations.

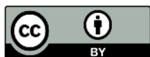

**Copyright:** © 2021 by the authors. Submitted for possible open access publication under the terms and conditions of the Creative Commons Attribution (CC BY) license (<http://creativecommons.org/licenses/by/4.0/>).

**Table S1.** Incidence of HCC according to lipid profile classification with a 2-year lag.

|       | HCC cases ( <i>n</i> ) | Incidence of HCC<br>(100,000 person-<br>years) | Crude HR<br>(95% CI) | Adjusted HR <sup>a</sup><br>(95% CI) | <i>p</i> -value |
|-------|------------------------|------------------------------------------------|----------------------|--------------------------------------|-----------------|
| TC    |                        |                                                |                      |                                      |                 |
| Q1    | 10,461                 | 67.87                                          | 1 (reference)        | 1 (reference)                        |                 |
| Q2    | 6,569                  | 43.03                                          | 0.63 (0.62–0.65)     | 0.61 (0.59–0.63)                     | <0.0001         |
| Q3    | 4,793                  | 32.88                                          | 0.48 (0.47–0.50)     | 0.46 (0.44–0.48)                     | <0.0001         |
| Q4    | 3,511                  | 24.98                                          | 0.37 (0.35–0.38)     | 0.36 (0.35–0.37)                     | <0.0001         |
| TG    |                        |                                                |                      |                                      |                 |
| Q1    | 6,529                  | 42.73                                          | 1 (reference)        | 1 (reference)                        |                 |
| Q2    | 7,602                  | 50.49                                          | 1.18 (1.14–1.22)     | 0.94 (0.90–0.98)                     | <0.0001         |
| Q3    | 6,620                  | 44.99                                          | 1.05 (1.02–1.09)     | 0.76 (0.71–0.81)                     | <0.0001         |
| Q4    | 4,583                  | 32.13                                          | 0.75 (0.72–0.78)     | 0.57 (0.52–0.63)                     | <0.0001         |
| LDL-C |                        |                                                |                      |                                      |                 |
| Q1    | 9,467                  | 62.57                                          | 1 (reference)        | 1 (reference)                        |                 |
| Q2    | 6,596                  | 43.55                                          | 0.70 (0.68–0.72)     | 0.62 (0.6–0.64)                      | <0.0001         |
| Q3    | 5,284                  | 36.09                                          | 0.58 (0.56–0.60)     | 0.47 (0.46–0.49)                     | <0.0001         |
| Q4    | 3,987                  | 27.70                                          | 0.44 (0.43–0.46)     | 0.35 (0.34–0.36)                     | <0.0001         |
| HDL-C |                        |                                                |                      |                                      |                 |
| Q1    | 7,353                  | 49.9                                           | 1 (reference)        | 1 (reference)                        |                 |
| Q2    | 5,671                  | 38.69                                          | 0.78 (0.749–0.803)   | 0.84 (0.81–0.87)                     | <0.0001         |
| Q3    | 5,732                  | 39.42                                          | 0.79 (0.764–0.818)   | 0.83 (0.80–0.86)                     | <0.0001         |
| Q4    | 6,578                  | 42.78                                          | 0.86 (0.83–0.888)    | 0.87 (0.84–0.9)                      | <0.0001         |

**Abbreviations:** HCC, hepatocellular carcinoma; TC, total cholesterol; HDL-C, high-density lipoprotein cholesterol; LDL-C, low-density lipoprotein cholesterol; TG, triglycerides; HR, hazard ratio; CI, confidence interval; BMI, body mass index; DM, diabetes mellitus. <sup>a</sup> Multivariable analysis including age, sex, alcohol consumption, smoking history, regular physical activity, income, BMI, hypertension, DM, and current fenofibrate medication.

**Table S2.** Incidence of HCC according to lipid profile classification excluding patients who had started statins during follow-up.

|       | HCC cases ( <i>n</i> ) | Incidence of HCC<br>(100,000 person-<br>years) | Crude HR<br>(95% CI) | Adjusted HR <sup>a</sup><br>(95% CI) | <i>p</i> -value |
|-------|------------------------|------------------------------------------------|----------------------|--------------------------------------|-----------------|
| TC    |                        |                                                |                      |                                      |                 |
| Q1    | 9,915                  | 66.34                                          | 1 (reference)        | 1 (reference)                        |                 |
| Q2    | 5,963                  | 41.45                                          | 0.63 (0.61–0.65)     | 0.61 (0.59–0.63)                     | <0.0001         |
| Q3    | 4,101                  | 31.29                                          | 0.47 (0.46–0.49)     | 0.46 (0.44–0.47)                     | <0.0001         |
| Q4    | 2,729                  | 24.12                                          | 0.37 (0.35–0.38)     | 0.36 (0.35–0.38)                     | <0.0001         |
| TG    |                        |                                                |                      |                                      |                 |
| Q1    | 6,186                  | 42.40                                          | 1 (reference)        | 1 (reference)                        |                 |
| Q2    | 6,949                  | 50.04                                          | 1.18 (1.14–1.22)     | 0.94 (0.90–0.99)                     | <0.0001         |
| Q3    | 5,819                  | 44.37                                          | 1.05 (1.01–1.09)     | 0.76 (0.70–0.81)                     | <0.0001         |
| Q4    | 3,754                  | 30.86                                          | 0.73 (0.70–0.76)     | 0.56 (0.50–0.62)                     | <0.0001         |
| LDL-C |                        |                                                |                      |                                      |                 |
| Q1    | 8,906                  | 61.51                                          | 1 (reference)        | 1 (reference)                        |                 |
| Q2    | 6,031                  | 42.31                                          | 0.69 (0.67–0.71)     | 0.62 (0.60–0.64)                     | <0.0001         |
| Q3    | 4,596                  | 34.67                                          | 0.56 (0.55–0.59)     | 0.47 (0.45–0.49)                     | <0.0001         |
| Q4    | 3,175                  | 26.99                                          | 0.44 (0.42–0.46)     | 0.35 (0.34–0.37)                     | <0.0001         |
| HDL-C |                        |                                                |                      |                                      |                 |
| Q1    | 6,487                  | 9.78                                           | 1 (reference)        | 1 (reference)                        |                 |
| Q2    | 5,017                  | 37.94                                          | 0.76 (0.73–0.79)     | 0.83 (0.80–0.86)                     | <0.0001         |
| Q3    | 5,211                  | 39.16                                          | 0.79 (0.76–0.82)     | 0.84 (0.81–0.87)                     | <0.0001         |
| Q4    | 5,993                  | 42.23                                          | 0.85 (0.82–0.88)     | 0.87 (0.84–0.91)                     | <0.0001         |

**Abbreviations:** HCC, hepatocellular carcinoma; TC, total cholesterol; HDL-C, high-density lipoprotein cholesterol; LDL-C, low-density lipoprotein cholesterol; TG, triglycerides; HR, hazard ratio; CI, confidence interval; BMI, body mass index; DM, diabetes mellitus. <sup>a</sup>Multivariable analysis including age, sex, alcohol consumption, smoking history, regular physical activity, income, BMI, hypertension, DM, and fenofibrate medication.

**Table S3.** Incidence of HCC according to lipid profile classification according to gender.

| <b>Male</b>   | <b>HCC cases (n)</b> | <b>Incidence of HCC<br/>(100,000 person-years)</b> | <b>Crude HR<br/>(95% CI)</b> | <b>Adjusted HR<sup>a</sup><br/>(95% CI)</b> |
|---------------|----------------------|----------------------------------------------------|------------------------------|---------------------------------------------|
| TC            |                      |                                                    |                              |                                             |
| Q1            | 8,770                | 102.58                                             | 1 (reference)                | 1 (reference)                               |
| Q2            | 5,386                | 61.52                                              | 0.6 (0.58–0.62)              | 0.62 (0.6–0.64)                             |
| Q3            | 3,919                | 45.4                                               | 0.44 (0.43–0.46)             | 0.47 (0.45–0.48)                            |
| Q4            | 2,948                | 33.87                                              | 0.33 (0.32–0.34)             | 0.38 (0.36–0.39)                            |
| TG            |                      |                                                    |                              |                                             |
| Q1            | 4888                 | 83.74                                              | 1 (reference)                | 1 (reference)                               |
| Q2            | 6,055                | 76.76                                              | 0.92 (0.88–0.95)             | 0.95 (0.9–0.99)                             |
| Q3            | 5,647                | 59.66                                              | 0.71 (0.69–0.74)             | 0.78 (0.73–0.84)                            |
| Q4            | 4,433                | 38.72                                              | 0.46 (0.44–0.48)             | 0.62 (0.55–0.69)                            |
| LDL-C         |                      |                                                    |                              |                                             |
| Q1            | 7992                 | 90.90                                              | 1 (reference)                | 1 (reference)                               |
| Q2            | 5381                 | 62.37                                              | 0.69 (0.66–0.71)             | 0.62 (0.6–0.65)                             |
| Q3            | 4,385                | 51.08                                              | 0.56 (0.54–0.58)             | 0.49 (0.48–0.51)                            |
| Q4            | 3,265                | 37.81                                              | 0.42 (0.4–0.43)              | 0.37 (0.35–0.38)                            |
| HDL-C         |                      |                                                    |                              |                                             |
| Q1            | 6,010                | 67.10                                              | 1 (reference)                | 1 (reference)                               |
| Q2            | 4508                 | 55.04                                              | 0.82 (0.79–0.85)             | 0.83 (0.8–0.86)                             |
| Q3            | 4820                 | 55.61                                              | 0.83 (0.8–0.86)              | 0.82 (0.79–0.86)                            |
| Q4            | 5685                 | 64.42                                              | 0.96 (0.93–1)                | 0.86 (0.83–0.9)                             |
| <b>Female</b> | <b>HCC cases (n)</b> | <b>Incidence of HCC<br/>(100,000 person-years)</b> | <b>Crude HR<br/>(95% CI)</b> | <b>Adjusted HR<br/>(95% CI)</b>             |
| TC            |                      |                                                    |                              |                                             |
| Q1            | 2,069                | 29.10                                              | 1 (reference)                | 1 (reference)                               |
| Q2            | 1,505                | 21.76                                              | 0.75 (0.7–0.8)               | 0.58 (0.54–0.62)                            |
| Q3            | 1,251                | 18.95                                              | 0.65 (0.61–0.7)              | 0.42 (0.39–0.45)                            |
| Q4            | 1,043                | 15.47                                              | 0.53 (0.49–0.57)             | 0.3 (0.27–0.32)                             |
| TG            |                      |                                                    |                              |                                             |
| Q1            | 1,823                | 18.78                                              | 1 (reference)                | 1 (reference)                               |
| Q2            | 1,914                | 24.98                                              | 1.33 (1.25–1.42)             | 0.97 (0.89–1.07)                            |
| Q3            | 1,431                | 23.79                                              | 1.26 (1.18–1.35)             | 0.74 (0.64–0.85)                            |

|       |       |       |                  |                  |
|-------|-------|-------|------------------|------------------|
| Q4    | 700   | 17.57 | 0.93 (0.85–1.02) | 0.52 (0.42–0.64) |
| LDL-C |       |       |                  |                  |
| Q1    | 1,854 | 27.70 | 1 (reference)    | 1 (reference)    |
| Q2    | 1,542 | 22.21 | 0.8 (0.75–0.86)  | 0.6 (0.56–0.65)  |
| Q3    | 1,293 | 19.34 | 0.7 (0.65–0.75)  | 0.42 (0.39–0.45) |
| Q4    | 1,179 | 16.73 | 0.6 (0.56–0.65)  | 0.29 (0.27–0.32) |
| HDL-C |       |       |                  |                  |
| Q1    | 1,881 | 28.21 | 1 (reference)    | 1 (reference)    |
| Q2    | 1,514 | 21.16 | 0.75 (0.7–0.8)   | 0.85 (0.8–0.91)  |
| Q3    | 1,226 | 19.01 | 0.68 (0.63–0.73) | 0.85 (0.79–0.91) |
| Q4    | 1,247 | 17.57 | 0.63 (0.58–0.67) | 0.88 (0.81–0.94) |

**Abbreviations:** HCC, hepatocellular carcinoma; TC, total cholesterol; HDL-C, high-density lipoprotein cholesterol; LDL-C, low-density lipoprotein cholesterol; TG, triglycerides; HR, hazard ratio; CI, confidence interval; BMI, body mass index; DM, diabetes mellitus. <sup>a</sup> Multivariable analysis including age, sex, alcohol consumption, smoking history, regular physical activity, income, BMI, hypertension, DM, and fenofibrate medication.

**Table S4.** Incidence of HCC according to lipid profile classification among subjects who had been taking statins at baseline ( $n = 1,124,359$ ).

|       | HCC cases ( $n$ ) | Incidence of HCC<br>(100,000 person-<br>years) | Crude HR<br>(95% CI) | Adjusted HR <sup>a</sup><br>(95% CI) | $P$ -value |
|-------|-------------------|------------------------------------------------|----------------------|--------------------------------------|------------|
| TC    |                   |                                                |                      |                                      |            |
| Q1    | 1,424             | 71.35                                          | 1 (reference)        | 1 (reference)                        |            |
| Q2    | 963               | 47.71                                          | 0.67 (0.62–0.72)     | 0.88 (0.81–0.96)                     | 0.004      |
| Q3    | 736               | 35.26                                          | 0.49 (0.45–0.54)     | 0.78 (0.71–0.86)                     | <0.001     |
| Q4    | 486               | 23.99                                          | 0.34 (0.3–0.37)      | 0.65 (0.59–0.73)                     | <0.001     |
| TG    |                   |                                                |                      |                                      |            |
| Q1    | 1,067             | 53.03                                          | 1 (reference)        | 1 (reference)                        |            |
| Q2    | 967               | 47.47                                          | 0.9 (0.82–0.98)      | 0.89 (0.79–0.99)                     | 0.039      |
| Q3    | 787               | 38.57                                          | 0.73 (0.66–0.8)      | 0.72 (0.61–0.84)                     | <0.001     |
| Q4    | 788               | 38.67                                          | 0.73 (0.67–0.8)      | 0.74 (0.58–0.93)                     | 0.011      |
| LDL-C |                   |                                                |                      |                                      |            |
| Q1    | 1,330             | 65.85                                          | 1 (reference)        | 1 (reference)                        |            |
| Q2    | 991               | 49.01                                          | 0.74 (0.68–0.81)     | 0.9 (0.83–0.98)                      | 0.018      |
| Q3    | 786               | 38.16                                          | 0.58 (0.53–0.63)     | 0.83 (0.76–0.91)                     | <0.001     |
| Q4    | 502               | 24.77                                          | 0.38 (0.34–0.42)     | 0.66 (0.59–0.73)                     | <0.001     |
| HDL-C |                   |                                                |                      |                                      |            |
| Q1    | 1,092             | 52.27                                          | 1 (reference)        | 1 (reference)                        |            |
| Q2    | 798               | 40.68                                          | 0.78 (0.71–0.85)     | 0.81 (0.74–0.89)                     | <0.001     |
| Q3    | 811               | 39.41                                          | 0.75 (0.69–0.83)     | 0.79 (0.72–0.86)                     | <0.001     |
| Q4    | 908               | 44.97                                          | 0.86 (0.79–0.94)     | 0.86 (0.78–0.95)                     | 0.002      |

**Abbreviations:** HCC, hepatocellular carcinoma; TC, total cholesterol; HDL-C, high-density lipoprotein cholesterol; LDL-C, low-density lipoprotein cholesterol; TG, triglycerides; HR, hazard ratio; CI, confidence interval; BMI, body mass index; DM, diabetes mellitus. <sup>a</sup>Multivariable analysis including age, sex, alcohol consumption, smoking history, regular physical activity, income, BMI, hypertension, DM, and fenofibrate medication.
